# Supplementary material for: Construction of Intrinsic Capacity Portrait and Influencing Factor Analysis of Rural Disabled Older Adults in China: A Cross-Sectional Study
Source: Research Square preprint supplement (doi:10.21203/rs.3.rs-7258039/v1), 2025-09-29
Supplement: Supplementary file 1 [file 38ca37e58e59324bd44abbbc.pdf]

## ***Sociodemographic characteristics***

1. Gender: ☐ Male ☐ Female
2. Age: ☐ 60~ ☐ 65~ ☐ 75~ ☐ 85~
3. Ethnicity: ☐ Han ☐ Ethnic minority
4. Are you religious? ☐ Yes ☐ None
5. Education level: ☐ Primary school and below ☐ Junior high school ☐ High school and above
6. Marital status: ☐ Married ☐ Others (Divorced/Widowed)
7. Number of children: ☐ 0 ☐ 1 ☐ 2 ☐ 3~
8. Child structure: ☐ Only sons ☐ Only daughters ☐ Have both a son and a daughter
9. Residency: ☐ Living with children ☐ Living with spouse ☐ Living with children and spouse ☐ Living alone ☐ Elderly care institutions
10. What is your current main source of income?  
☐ Retirement salary ☐ Child allowance ☐ Sponsored by friends and family  
☐ Government Relief ☐ pension ☐ Others (part-time job/farming)
11. What is your current personal monthly income? (including all income from children's subsidies, pension insurance, etc.) RMB  
☐ <500 ☐ 500~ ☐ 1000~
12. How many medications are you currently taking?  
☐ 1 ☐ 2 ☐ 3 ☐ 4 ☐ 5~
13. How much do you pay for medical care each month?  
☐ <100 ☐ 100~ ☐ 500~ ☐ 1000~ ☐ 2000~
14. Form of medical insurance:  
☐ Medical insurance for urban workers ☐ Medical insurance for urban and rural residents ☐ Business insurance ☐ At your own expense
15. Cause of disability:  
☐ Disease ☐ Accidentally ☐ Senescence
16. Duration of Disability (years):  
☐ <1 ☐ 1~ ☐ 5~ ☐ 10~ ☐ 15~

17.Grip strength level/kg

☐ <4.9    ☐ 4.9~    ☐ 8.6~    ☐ 10.1~    ☐ 17.4~

18.BMI/kg/m<sup>2</sup>

☐ <18.5    ☐ 18.5~    ☐ 24~    ☐ 28~
